# Supplementary material for: Proteomics and Metabolomics Profiling of Pork Exudate Reveals Meat Spoilage during Storage
Source: MDPI journal article supplement (doi:10.3390/metabo12070570), 2022-06-21
Supplement: s1 [file s1]

Table S1. Identification of significantly differential metabolites in pork exudate during storage at four temperatures

| Category                | Name                            | VIP   | Fold change |        |         |         | P value |        |         |         |
|-------------------------|---------------------------------|-------|-------------|--------|---------|---------|---------|--------|---------|---------|
|                         |                                 |       | -2 vs C     | 4 vs C | 10 vs C | 25 vs C | -2 vs C | 4 vs C | 10 vs C | 25 vs C |
| Organic/Fatty acids     | Stearolic acid                  | 1.143 | 16.84       | 26.40  | 2.03    | 52.29   | 0.01    | 0.02   | < 0.01  | < 0.01  |
|                         | 9,10-Epoxystearic acid          | 1.004 | 87.21       | 136.24 | 2.59    | 71.95   | < 0.01  | 0.02   | < 0.01  | < 0.01  |
|                         | Juniperic acid                  | 1.004 | 32.78       | 23.43  | 4.30    | 19.12   | < 0.01  | 0.01   | < 0.01  | < 0.01  |
|                         | 4-Hydroxy-4-methylglutamic acid | 1.161 | 0.38        | 0.32   | 0.28    | 0.08    | < 0.01  | < 0.01 | < 0.01  | < 0.01  |
|                         | Ascorbic acid                   | 1.206 | 0.16        | 0.16   | 0.63    | 0.15    | < 0.01  | < 0.01 | < 0.01  | < 0.01  |
|                         | 3-Deoxyarabinohexonic acid      | 1.181 | 0.17        | 0.36   | 0.26    | 0.33    | 0.01    | < 0.01 | < 0.01  | < 0.01  |
|                         | Isopropylmalic acid             | 1.007 | 84.46       | 41.37  | 0.26    | 11.88   | < 0.01  | 0.05   | < 0.01  | < 0.01  |
|                         | $\gamma$ -Aminobutyric acid     | 1.139 | 0.09        | 0.08   | 0.03    | 0.03    | < 0.01  | < 0.01 | < 0.01  | < 0.01  |
| Esters                  | Carnitine                       | 1.087 | 0.19        | 0.13   | 0.07    | 0.10    | 0.02    | 0.01   | 0.01    | 0.01    |
|                         | Tiglylcarnitine                 | 1.116 | 0.21        | 0.10   | 0.22    | 0.22    | < 0.01  | < 0.01 | < 0.01  | < 0.01  |
| Nucleotides/Nucleosides | 5,6-Dihydrothymidine            | 1.186 | 3.19        | 3.09   | 3.60    | 2.22    | < 0.01  | < 0.01 | < 0.01  | < 0.01  |
|                         | Dihydrothymine                  | 1.129 | 2.84        | 2.54   | 2.68    | 2.08    | < 0.01  | < 0.01 | < 0.01  | < 0.01  |
|                         | Inosine 5'-monophosphate        | 1.115 | 0.39        | 0.29   | 0.34    | 0.43    | < 0.01  | 0.01   | < 0.01  | < 0.01  |
|                         | Hypoxanthine                    | 1.074 | 0.24        | 0.17   | 0.42    | 0.20    | < 0.01  | < 0.01 | < 0.01  | < 0.01  |
| Peptides/Amino acids    | Ala-Tyr                         | 1.141 | 0.40        | 0.31   | 0.25    | 0.02    | < 0.01  | < 0.01 | < 0.01  | < 0.01  |
|                         | Leu-Leu                         | 1.160 | 0.10        | 0.08   | 0.04    | 0.02    | < 0.01  | < 0.01 | < 0.01  | < 0.01  |
|                         | Leu-Val                         | 1.138 | 0.04        | 0.03   | 0.07    | 0.02    | < 0.01  | < 0.01 | < 0.01  | < 0.01  |
|                         | Val-Val                         | 1.146 | 0.28        | 0.26   | 0.24    | 0.04    | < 0.01  | < 0.01 | < 0.01  | < 0.01  |
|                         | Arginine                        | 1.129 | 0.05        | 0.04   | 0.03    | 0.13    | 0.01    | 0.01   | < 0.01  | 0.01    |
| Lipids                  | PC(34:4)                        | 1.038 | 4.51        | 11.74  | 0.41    | 0.40    | < 0.01  | 0.03   | < 0.01  | < 0.01  |
|                         | PC(36:3)                        | 1.467 | 11.54       | 11.55  | 13.68   | 8.31    | 0.01    | < 0.01 | 0.01    | 0.02    |
| Carbohydrates           | Fructose 6-phosphate            | 1.150 | 0.07        | 0.08   | 0.05    | 0.15    | < 0.01  | < 0.01 | < 0.01  | < 0.01  |
|                         | Glucose 6-phosphate             | 1.125 | 0.08        | 0.08   | 0.05    | 0.21    | < 0.01  | < 0.01 | < 0.01  | < 0.01  |
| Alcohols                | Prosopinine                     | 1.087 | 10.66       | 9.77   | 2.66    | 98.96   | < 0.01  | 0.02   | < 0.01  | 0.02    |
|                         | Estrane-3,17-diol               | 1.126 | 4.03        | 6.33   | 0.44    | 36.96   | < 0.01  | 0.04   | 0.03    | 0.01    |
| Ketone                  | 6-Hydroxypseudoxyonicotine      | 1.238 | 57.60       | 60.18  | 4.40    | 126.45  | < 0.01  | 0.03   | < 0.01  | < 0.01  |
|                         | Farnesylacetone                 | 1.155 | 16.98       | 26.82  | 2.08    | 52.86   | 0.01    | 0.02   | < 0.01  | < 0.01  |
| Others                  | Hexose                          | 1.109 | 0.08        | 0.12   | 0.26    | 0.12    | < 0.01  | < 0.01 | < 0.01  | < 0.01  |
|                         | Stearoyl Ethanolamide           | 1.076 | 2.28        | 3.56   | 5.03    | 5.87    | 0.01    | < 0.01 | < 0.01  | < 0.01  |
|                         | Dibenzylamine                   | 1.135 | 0.39        | 0.29   | 2.32    | 0.39    | < 0.01  | 0.01   | < 0.01  | < 0.01  |
