# Supplementary figures and images for: Proteomics and Metabolomics Profiling of Pork Exudate Reveals Meat Spoilage during Storage
Source: MDPI journal article supplement (doi:10.3390/metabo12070570), 2022-06-21

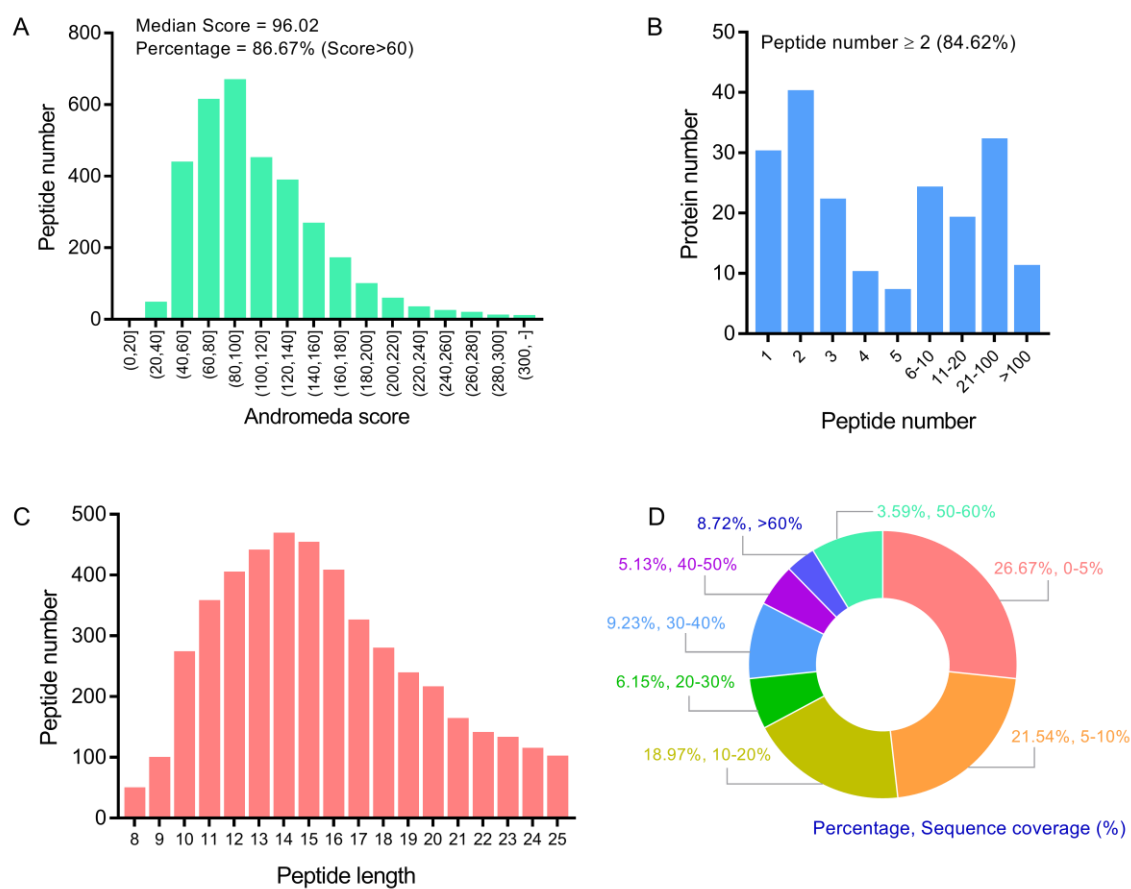

Figure S1.

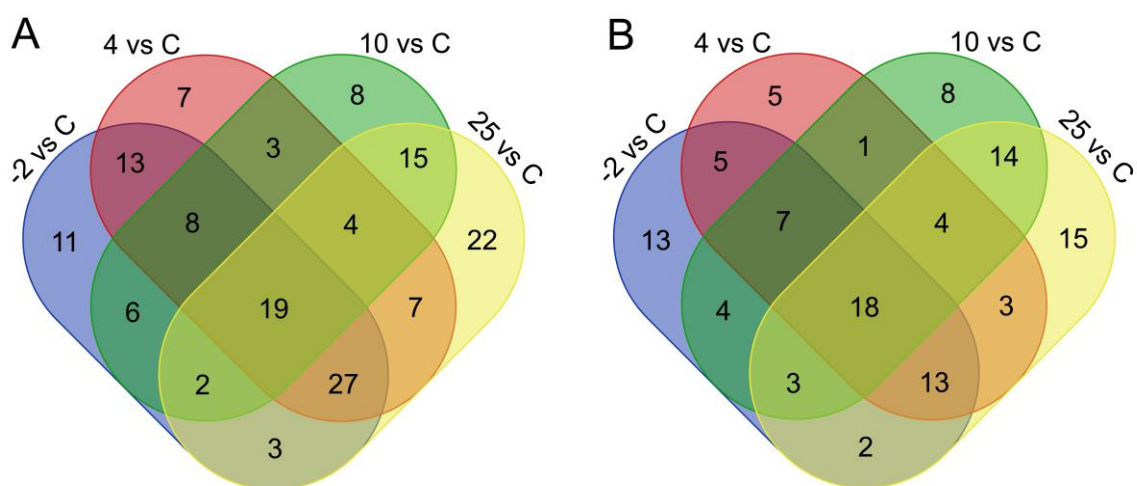

Figure S2.

Supplement: s1 [file s1]
